# Host-mediated, cross-generational intraspecific competition in a multivoltine herbivore species

Bastien Castagneyrol<sup>1,\*</sup> Inge van Halder<sup>1</sup> Yasmine Kadiri<sup>1</sup>  
Laura Schillé<sup>1</sup> Hervé Jactel<sup>1</sup>

<sup>1</sup> Univ. Bordeaux, INRAE, BIOGECO, F-33612 Cestas, France

\* Bastien Castagneyrol, INRAE UMR BIOGECO, 69 route d’Arcachon, FR-33612 Cestas Cedex, France ; [bastien.castagneyrol@inrae.fr](mailto:bastien.castagneyrol@inrae.fr)

August 9, 2020

Conspecific insect herbivores co-occurring on the same host plant interact both directly through interference competition and indirectly through exploitative competition, plant-mediated interactions and enemy-mediated interactions. However, the situation is less clear when the interactions between conspecific insect herbivores are separated in time within the same growing season, as it is the case for multivoltine species. We hypothesized that early season herbivory would result in reduced egg laying and reduced performance of the next generation of herbivore on previously attacked plants. We tested this hypothesis in a choice experiment with box tree moth females, *Cydalima perspectalis* Walker (Lepidoptera: Crambidae), to which box trees, *Buxus sempervirens* L. (Buxaceae), were proposed that had or had not been previously defoliated by BTM larvae earlier in the season. We then compared the performance of the next generation larvae on previously damaged *vs* undamaged plants. Previous herbivory had no effect on oviposition behaviour, but the weight of next generation larvae was significantly lower in previously damaged plants. There was a negative correlation between the number of egg clutches per plant and larval performance. Overall, our findings reveal that early season herbivory reduces the performance of conspecific individuals on the same host plant later in the growing season, and that this time-lagged intraspecific competition results from a mismatch between the oviposition preference of females and the performance of their offspring.

## 1 Introduction

Insect herbivores exploiting the same plant can compete for food, even when interactions among individuals are separated in time (Kaplan & Denno, 2007). Insects may thus reduce the impact of inter- and intraspecific competition by avoiding crowded plants, or plants that have been previously consumed by herbivores, which supposes that they can detect competitors or their effects on plants (De Moraes et al., 2001; Shiojiri & Takabayashi, 2003). For many species, the choice of the oviposition site by mated females is crucial in this respect. The preference-performance hypothesis - *aka* the ‘*mother knows best hypothesis*’ - states that female insects evolved host searching behaviour that leads them to oviposit on hosts where their offspring do best (Gripenberg et al., 2010). A good match between the preference of a mated female for a given plant and the performance of their offspring developing on the same plant implies that females can recognize cues that correlate with larval performance, in particular those related to plant defenses and nutritional quality. Yet, these cues can be largely modified by the simultaneous or sequential presence of other competing herbivores (Bultman & Faeth, 1986; Nykänen & Koricheva, 2004; Abdala-Roberts et al., 2019; Visakorpi et al., 2019). Therefore, initial herbivory may have time-lagged consequences of the preference and performance

42 of herbivores that subsequently attack the same plant in the same growing season (Poelman et al., 2008;  
43 Stam et al., 2014). However, while such time-lagged *interspecific* interactions between herbivores have long  
44 been documented (Faeth, 1986), surprisingly much less is known about delayed *intraspecific* interactions in  
45 multivoltine species.

46 Previous herbivory can influence the oviposition preference of later herbivores. Several studies have demon-  
47 strated that mated females can discriminate host plants that have been previously attacked by insect herbivores  
48 (Wise & Weinberg, 2002; Stam et al., 2014; Moura et al., 2017; Barnes & Murphy, 2018; Moreira et al.,  
49 2018; Weeraddana & Evenden, 2019). This behaviour involves the use of a mix of plant and herbivore  
50 cues to detect the passage of competitors on potential hosts. Several mechanisms can explain such indirect  
51 interactions between herbivores separated in time. First, mated females can directly detect the present, past  
52 and possibly future presence of competitors. For instance, Averill & Prokopy (1987) showed that female  
53 *Rhagoletis pomonella* Walsh (Diptera: Tephritidae) marks its oviposition site with an epideictic pheromone  
54 that deter conspecific females from laying eggs, thus reducing intraspecific competition at the larval stage.  
55 The frass of several Lepidoptera species was also found to act as an oviposition deterrent to subsequent  
56 herbivores (Jones & Finch, 1987; Hashem et al., 2013; Molnár et al., 2017). Second, herbivory can induce  
57 changes in the physical and chemical characteristics of attacked plants (Marchand & McNeil, 2004; Blenn et  
58 al., 2012; Fatouros et al., 2012; Hilker & Fatouros, 2015; Abdala-Roberts et al., 2019), thereby reducing their  
59 attractivity to mated females.

60 Previous herbivory generally reduces the performance of later herbivores. A common mechanism is that  
61 herbivory induces changes in plant quality and defenses that generally reduce the performance of late coming  
62 herbivores (Wratten et al., 1988; Agrawal, 1999; Abdala-Roberts et al., 2019). For instance, prior damage by  
63 the western tent caterpillar *Malacosoma californicum* Packard (Lepidoptera: Lasiocampidae) induces the  
64 regrowth of tougher leaves acting as physical defenses and reducing the fitness of the next tent caterpillars  
65 generation (Barnes & Murphy, 2018). However, several authors reported a mismatch between prior herbivory  
66 effects on female oviposition preference *vs* larval growth, consumption or survival of their offspring (Wise  
67 & Weinberg, 2002; Bergamini & Almeida-Neto, 2015; Martinez et al., 2017). For instance, Weeraddana  
68 and Evenden (2019) found that herbivory by the diamondback moth, *Plutella xylostella* (L.) (Lepidoptera:  
69 Plutellidae) on canola plants (*Brassica napus* L.) had no effect on subsequent oviposition by the bertha  
70 armyworm, *Mamestra configurata* Walker (Lepidoptera: Noctuidae) whereas its larvae had reduced growth  
71 on previously damaged plants. It follows that a sound understanding of the effect of prior herbivory on  
72 subsequent herbivory requires studying its effect on the preference and performance of later herbivores  
73 simultaneously.

74 The box tree moth (BTM) *Cydalima perspectalis* Walker (Lepidoptera: Crambidae) is a multivoltine moth  
75 species introduced to Europe in 2007 from Asia (Wan et al., 2014). In its native range, BTM larvae can  
76 feed on different host genera, whereas in Europe they feed exclusively on box trees (*Buxus spp*) (Wan et al.,  
77 2014). In the introduced area, the BTM overwinters at the larval stage, mainly in the third instar, such that  
78 defoliation restarts at the beginning of the growing season. In Europe, damage is aggravated by the fact  
79 that the BTM has 3-4 generations a year (Kenis et al., 2013; Matošević et al., 2017). When several pest  
80 generations successively defoliate the same box tree, there are no leaves left to eat and the caterpillars then  
81 feed on the bark, which can lead to the death of the host tree (Kenis et al., 2013; Wan et al., 2014; Alkan  
82 Akıncı & Kurdoğlu, 2019). In the present study, we investigated the consequences of defoliation by the first,  
83 spring generation of BTM larvae on the oviposition behaviour of the adults and the larval performance in  
84 the next generation. We hypothesized that early herbivory would reduce oviposition on previously attacked  
85 hosts and reduce the performance of the next generation larvae feeding on damaged hosts. By addressing the  
86 above, our study brings new insights into the understanding of cross-generational intraspecific competition in  
87 insect herbivores and further challenges the ‘*mother knows best hypothesis*’.

## 2 Materials and methods

### 2.1 Biological material

In spring 2019, we obtained box trees from a commercial nursery and kept them in a greenhouse at INRAE Bordeaux forest research station. Box trees were on average 25 cm high and 20 cm wide. We transferred them into 5 L pots with horticultural loam. For two months, we watered them every four days from the above (*i.e.* watering leaves too) to remove any potential pesticide remain.

BTM larvae (L1-L3) overwinter in cocoons tied between two adjacent leaves. We initiated BTM larvae rearing with caterpillars collected in the wild in early spring 2019. We reared them at room temperature in 4320  $cm^3$  plastic boxes, and fed them *ad libitum*, with branches collected on box trees around the laboratory. At 25°C, the BTM achieves one generation in 45 days. The larval phase lasts for about 30 days. Adults live 12-15 days. A single female lays on average 800 eggs. We initiated the herbivory on box tree plants with larvae which were the offspring of the overwintering generation. Their adults were used in the preference test, and second generation larvae used in the performance test (see below).

### 2.2 Experimental design

On June 18<sup>th</sup> 2019, we haphazardly assigned box trees to *control* and *herbivory* experimental groups. The *herbivory* treatment consisted of  $n = 60$  box trees that received five L3 larvae each. Larvae were allowed to feed freely for one week, after which we removed them all from plant individuals. In order to confirm that the addition of BTM larvae caused herbivory, we visually estimated BTM herbivory as the percentage of leaves consumed by BTM larvae, looking at every branch on every plant. We then averaged herbivory at the plant level. Herbivory ranged from 2 to 18% and was on average 9%. The *control* group ( $n = 61$ ) did not receive any BTM larva. On July 8<sup>th</sup>, we randomly distributed plants of the *herbivory* and *control* treatments on a 11 × 11 grid in a greenhouse. We left 40 cm between adjacent pots, which was enough to avoid any physical contact between neighbouring plants (**Figure 1, Figure 2**).

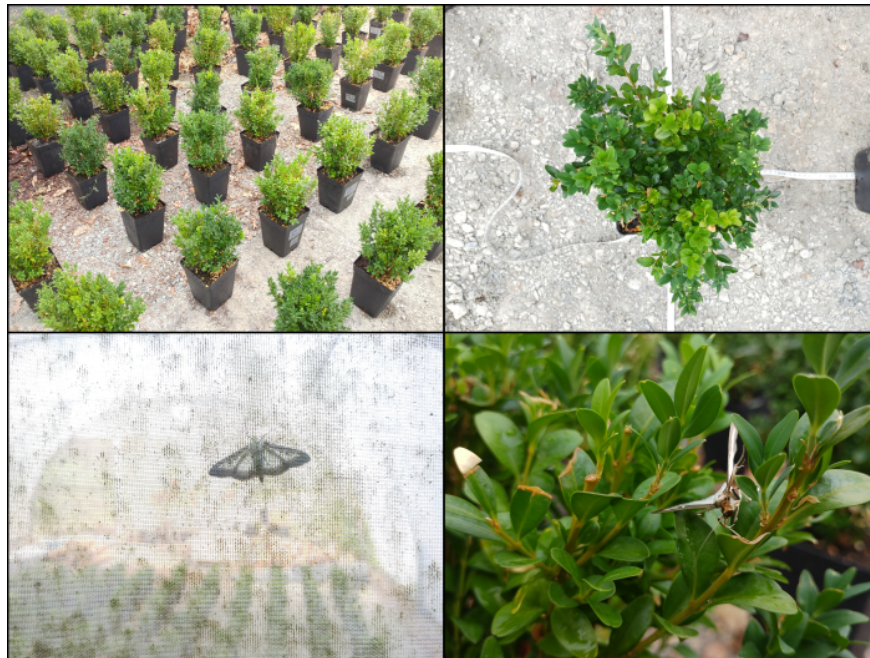

Figure 1: Photos illustrating the experimental design.

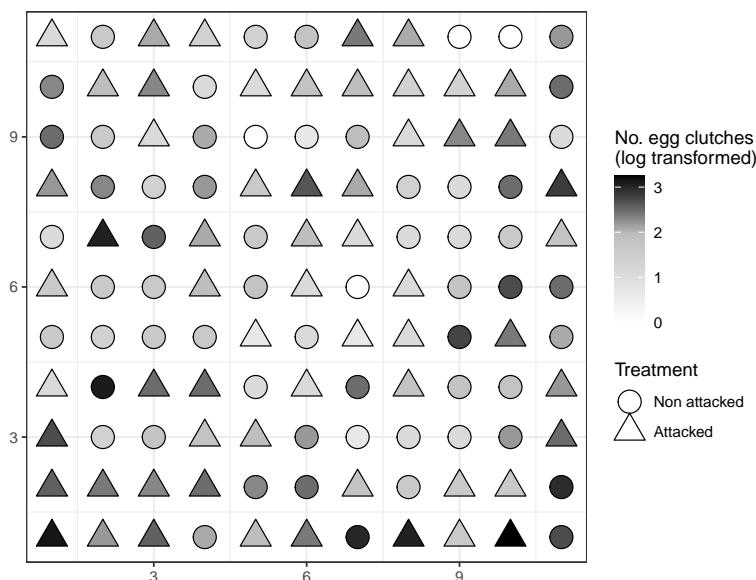

Figure 2: Experimental design. Pots were 40 cm apart. Circles and triangles represent control and non-attacked trees. Scale colour represents the number of egg clutches per box tree (log-transformed).

111 The same day, we released *ca* 100 BTM moths that had emerged from chrysalids less than two days before  
 112 (*i.e.*, an uncontrolled mix of males and females). Moths were allowed to fly freely within the greenhouse.  
 113 They could feed on small pieces of cotton imbued with a sugar-water solution, disposed on the ground in the  
 114 greenhouse.

115 It is important to note that at the time we released moths, there were no larvae feeding on experimental box  
 116 trees anymore. In addition, at this time, plants in the herbivory treatment had been cleared of caterpillars for  
 117 three weeks during which they were watered every two to three days from above. Although larval frass may  
 118 have been present in pots submitted to the herbivory treatment, it should have been washed out. Finally, we  
 119 carried out our experiment in an enclosed greenhouse in which the potential effect of natural enemies on  
 120 BTM behaviour can be neglected. The consequences are that any effect of prior herbivory on subsequent  
 121 oviposition behaviour and larval performance should have been independent of cues emitted by BTM larvae  
 122 themselves or by their frass (Sato et al., 1999; Molnár et al., 2017) and therefore were only plant-mediated.

### 123 2.3 BTM host choice

124 In order to test whether initial defoliation of focal plants influenced host choice for oviposition by BTM  
 125 females, we counted egg clutches on every branch of every box tree on July 17<sup>th</sup>. Once eggs were counted, we  
 126 moved box trees to another greenhouse. We installed box trees in plastic saucers. We interspaced plants and  
 127 filled saucers with a few centimeters of water (renewed regularly) to prevent larvae from moving from one  
 128 potted plant to another.

### 129 2.4 BTM growth rate

130 Fifteen days later (July 31<sup>st</sup>), we counted larvae on every plant and haphazardly collected five L3 BTM  
 131 larvae per box tree. We kept them in Petri dishes without food for 24h and weighted them to the closest 10  
 132  $\mu\text{g}$ . In some Petri dishes, we observed cases of cannibalism such that in some instances we could only weight  
 133 two larvae. We therefore calculated the average weight of a L3 larva, dividing the total mass by the number  
 134 of larvae. Because we did not record the day every single egg hatched, we could not quantify the number of  
 135 days caterpillars could feed and therefore simply analysed the average weight of a L3 larva.

136 Larvae were allowed to complete their development on the potted box trees. After every larvae pupated, we  
137 counted the number of chrysalis per box tree and weighted them to the closest 10 µg.

138 At this stage of the experiment, box trees that had hosted BTM were close to 100% defoliated so that it  
139 is possible that some larvae ran out of food before they pupated. In addition, we noticed that the number  
140 of chrysalis in 32 control plants (out of 60, *i.e.* 53%) was greater than the number of larvae (and only in 1  
141 previously attacked plant) suggesting that in spite of our precautions some larvae could have moved from  
142 attacked to control plots (**Table 1**). We therefore decided not to analyze data on chrysalis.

## 143 2.5 Analyses

144 All analyses were ran in R using libraries *nlme* and *car* (Fox et al., 2016; Team, 2018; Pinheiro et al., 2020).

145 We first looked for spatial patterns in female BTM oviposition. We ran a generalized least square model  
146 (GLS) testing the effect of  $x$  and  $y$  coordinates on the number of clutches per plant (*log*-transformed) from  
147 which we explored the associated variogram using the functions *gls* and *Variogram* in the *nlme* library. There  
148 was evidence that oviposition was spatially structured, with strong spatial autocorrelation between 1 and 3m  
149 (**Figure S1**).

150 We tested the effect of prior herbivory on female BTM oviposition while controlling for spatial non-independence  
151 using a GLS. We had no particular hypothesis regarding the shape of the spatial correlation structure. We  
152 therefore ran separate models with different spatial correlation structures (namely, exponential, Gaussian,  
153 spherical, linear and rational quadratic), as well as a model with no correlation structure, and compared  
154 them based on their AIC (Zuur, 2009). For each model, we computed the  $\Delta AIC$  (*i.e.*,  $\Delta_i$ ) as the difference  
155 between the AIC of each model  $i$  and that of the model with the lowest AIC (Burnham & Anderson, 2002).  
156 We report and interpret the results of the model with the lowest AIC (see *Results*).

157 We then tested the effect of prior herbivory on BTM performance using ordinary least square models, with the  
158 mean weight of five L3 larvae (*log*-transformed) as a response variable, the herbivory treatment (non-attacked  
159 *vs* attacked) as a two-levels factor and the number of egg clutches as a covariate.

## 160 3 Results

161 We counted a total of 818 egg clutches and 593 larvae. At individual box tree level, the number of egg clutches  
162 varied from 0 to 25 (mean  $\pm$  SD:  $6.76 \pm 5.11$ , **Figure 2**).

163 When modelling the effect of prior herbivory on the number of egg clutches, the best model (*i.e.*, model 6  
164 with  $\Delta_i = 0$ , **Table 2**) was the model with a rational quadratic spatial correlation. It was competing with  
165 two other models with  $\Delta_i < 2$  (**Table 2**). The  $\Delta_i$  of the model with no correlation structure was  $> 13$ ,  
166 confirming that accounting for spatial autocorrelation among plants improved model fit.

167 Prior herbivory had no significant effect on the number of egg clutches per plant (model 6:  $\chi^2 = 2.91$ ,  $P =$   
168  $0.088$ , **Figure 3A**). Competing models 2 and 3 provided the same conclusion.

169 The weight of BTM larvae varied from 6 to 54 mg (mean  $\pm$  SD:  $20 \pm 9$  mg). BTM larval weight was lower  
170 on box trees that had been previously defoliated (**Table 3, Figure 3B**). There was a significant, negative

Table 1: Repartition of egg clutches, larvae and chrysalis across box trees with or without prior herbivory. Numbers correspond to mean ( $\pm$  sd) and total number of egg clutches, larvae or chrysalis (n).

| Response variable | Control              | Herbivory treatment  |
|-------------------|----------------------|----------------------|
| Egg clutches      | 6.1 (4.87), n = 372  | 7.43 (5.3), n = 446  |
| Larvae            | 4.84 (0.61), n = 295 | 4.97 (0.18), n = 298 |
| Chrysalis         | 6.8 (5.78), n = 415  | 1.85 (1.79), n = 111 |

Table 2: Summary of AIC of GLS models testing the effect of prior herbivory on the number of egg clutches with different spatial correlation structures.

| Model   | Correlation structure | df | AIC   | Delta |
|---------|-----------------------|----|-------|-------|
| Model 1 | None                  | 3  | 262.5 | 13.1  |
| Model 2 | Exponential           | 5  | 249.8 | 0.4   |
| Model 3 | Gaussian              | 5  | 250.2 | 0.8   |
| Model 4 | Spherical             | 5  | 250.9 | 1.5   |
| Model 5 | Linear                | 5  | 255.1 | 5.7   |
| Model 6 | Rational quadratic    | 5  | 249.4 | 0.0   |

171 relationship between larval weight and the number of egg clutches on a box tree (**Table 3, Figure 3B**),  
 172 suggesting intraspecific competition for food. There was no significant interaction between the herbivory  
 173 treatment and the number of egg clutches, indicating that intraspecific competition was independent of prior  
 174 herbivory (**Table 3**). The model explained 29 % variability in larval weight.

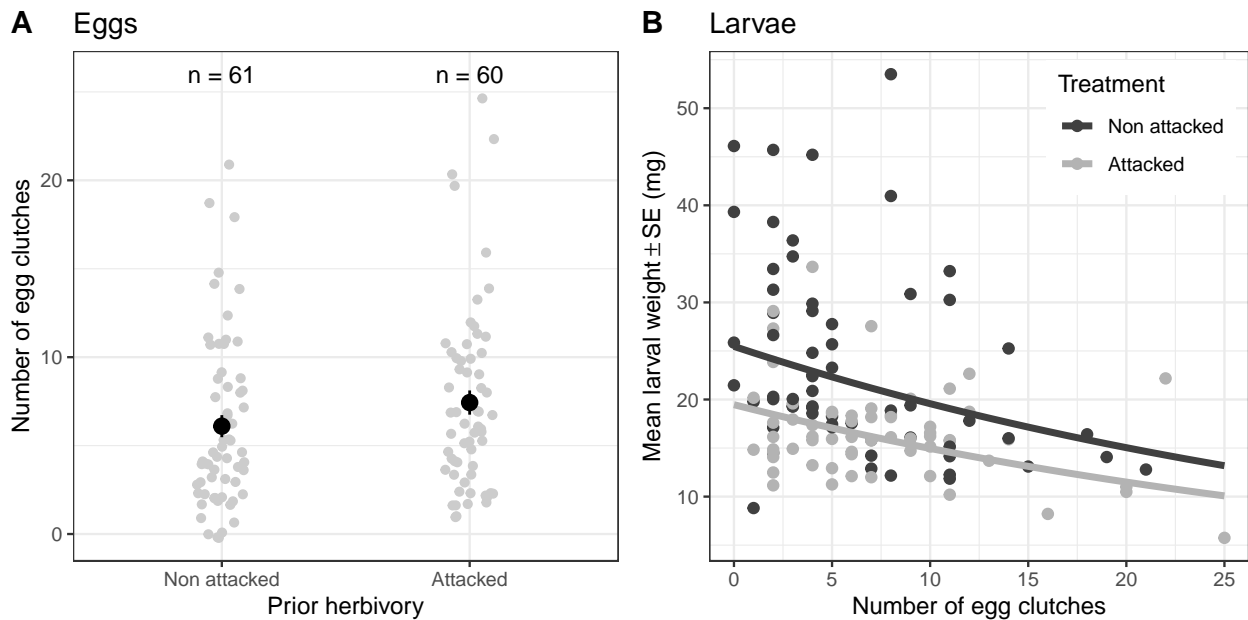

Figure 3: Effects of prior herbivory and conspecific density on (A) the number of egg clutches and (B) L3 larva weight. In A, grey dots represent raw data. Black dots and vertical bars represent raw means ( $\pm$  SE). In B, dots represent raw data. Black and grey curves represent model predictions for control and herbivory treatments, respectively.

## 175 4 Discussion

176 Our findings reveal that early season herbivory reduces the performance of conspecific individuals that  
 177 subsequently attack the same host plant later in the plant growing season, and that this time-lagged  
 178 intraspecific competition results from a mismatch between female oviposition preference and the performance  
 179 of its offspring.

180 **Prior herbivory had no effect BTM oviposition choice.** Possible explanations are that prior herbivory  
 181 had no effect on box tree characteristics, or that female BTM were indifferent to them.

Table 3: Summary of models testing the effect of prior herbivory and initial egg clutch density on BTM larval weight

| Predictor              | df     | Estimate (SE) | F-value | P-value |
|------------------------|--------|---------------|---------|---------|
| Number of egg clutches | 1, 117 | -0.03 (0.01)  | 20.20   | < 0.001 |
| Herbivory              | 1, 117 | -0.34 (0.1)   | 20.30   | < 0.001 |
| Eggs x Herbivory       | 1, 117 | 0.01 (0.01)   | 0.73    | 0.396   |

182 The first explanation seems unlikely as numerous studies have clearly established that insect herbivory induces  
183 changes in plant physical and chemical traits, which have profound consequences on herbivores or herbivory  
184 on the same host plant latter in the season (Wise & Weinberg, 2002; Poelman et al., 2008; Stam et al., 2014;  
185 Abdala-Roberts et al., 2019; but see Visakorpi et al., 2019). For instance, Barnes and Murphy (2018) recently  
186 observed that the number of eggs laid by western tent caterpillar (*Malacosoma californicum*) females was  
187 much lower on chokecherry trees (*Prunus virginiana*) that have been defoliated by conspecific caterpillars  
188 earlier in the season, as a likely result of induced increase in leaf toughness. In our case, it is also possible  
189 that induced defense reactions were delayed in box trees, or that they were already relaxed when we released  
190 BTM moths three weeks after the herbivory treatment (Karban, 2011), which remains to be evaluated.

191 We cannot dismiss the second explanation that BTM females were indifferent to box tree cues related to  
192 earlier herbivory. This may be particularly true in species whose females individually lay several hundred  
193 eggs, thus corresponding to a within-generation bet-hedging strategy (Root & Kareiva, 1984; Hopper, 1999).  
194 Consistently, Leuthardt and Baur (2013) observed that BTM females evenly distributed egg clutches among  
195 leaves and branches, and that oviposition preference was not dictated by the size of the leaves. Assuming that  
196 this behavior is reproducible, the close distance between box-trees that we used in the present experiment (40  
197 cm) could explain the lack of effect of initial defoliation on BTM oviposition behavior. In addition, Leuthardt  
198 *et al.* (2013) showed that BTM larvae are able to store or metabolise highly toxic alkaloid present in box tree  
199 leaves. Last, BTM larvae proved to be unable to distinguish between box tree leaves infected or not by the  
200 box rust *Puccinia buxi*, while their growth is reduced in the presence of the pathogenic fungus (Baur et al.,  
201 2019). Altogether, these results suggest that BTM female moths are not influenced by the amount of intact  
202 leaves and probably not either by their chemical quality when choosing the host plant, perhaps because of  
203 their strong ability to develop on toxic plants.

204 **Prior box tree defoliation by the spring generation of BTM larvae reduced the growth of the**  
205 **next generation.** Two alternative, non-mutually exclusive mechanisms can explain this pattern. First,  
206 the reduced performance of individuals of the second generation can have been trait-mediated and have  
207 resulted from induced plant defenses. This explanation is in line with studies that have documented in  
208 several plant species reduced herbivore performance and changes in plant-associated herbivore communities  
209 linked to induced defenses after prior herbivory (Nykänen & Koricheva, 2004; Karban, 2011; Stam et al.,  
210 2014). In the case of multivoltine species, negative relationship between prior herbivory and subsequent larva  
211 growth rate would indicate intraspecific plant-mediated cross-generation competition between cohorts of  
212 herbivores separated in time (Barnes & Murphy, 2018), which could influence herbivore population dynamics  
213 and distribution across host individuals. However, this explanation is partially conflicting with previous  
214 observations that BTM larva growth rate did not differ significantly among box-tree varieties, suggesting  
215 broad tolerance to variability in host traits (Leuthardt et al., 2013). Alternatively, reduced performance on  
216 previously defoliated plants may partly result from food shortage and increased exploitative competition  
217 among larvae of the same cohort. Although free living mandibulate herbivores were described to be less  
218 sensitive to competition (Denno et al., 1995), the effect of food shortage may have been exacerbated by the  
219 small size of box trees and interference competition, for instance through cannibalism (Kaygin & Taşdeler,  
220 2019) (Schillé and Kadiri, *personal observation*).

221 Herbivore feeding behavior is an important determinant of herbivore adaptive response to plant defenses  
222 (Karban, 2011; Weeraddana & Evenden, 2019). Yet, in our case, larvae were not allowed to move freely  
223 and leave the potted tree to find a more suitable host, or more generally escape competition. It is therefore  
224 possible that our experimental setup overestimates the effect of intraspecific competition. Whether this

225 finding is relevant to real world interactions remains to be tested.

226 **We detected a negative relationship between the number of egg clutches laid by BTM female**  
227 **moths and the subsequent growth of BTM larvae.** This suggests the existence of intraspecific  
228 competition for food with the same cohort. Such competition has already been reported, particularly in  
229 leaf-miners (Bultman & Faeth, 1986; Faeth, 1992), which are endophagous insect herbivores whose inability  
230 to move across leaves makes them particularly sensitive to the choice of oviposition sites by gravid female.  
231 In our study, we prevented larvae from moving from one plant to another and noticed that some box trees  
232 were completely defoliated by the end of the experiment. Although we did not record this information, it is  
233 very likely that larvae first ran out of food in plants on which several egg clutches were laid. We are however  
234 unable to determine whether the observed intraspecific competition in this cohort was determined by food  
235 shortage, or by herbivore-induced changes in resource quality, or both.

## 236 5 Conclusion

237 Our greenhouse experiment provides evidence for negative interaction across and within BTM generation,  
238 which are independent of BTM female choice for oviposition site. Such interactions may have consequences  
239 on BTM population dynamics and damage on box-trees. On the one hand, the slow-growth-high-mortality  
240 hypothesis states that any plant trait reducing the growth rate of herbivores can be seen as a resistance trait,  
241 because slow-growing herbivores are longer exposed to their enemies (Benrey & Denno, 1997; Coley et al.,  
242 2006; Uesugi, 2015). It is therefore possible that a stronger top-down control can be exerted by generalist  
243 enemies on BTM larvae feeding on previously defoliated hosts which could reduce damage on box-trees. On  
244 the other hand, if herbivores take a longer time to complete development, they may be more damaging to  
245 plants, in particular to plants with low nutritional quality as a result of compensatory feeding (Simpson  
246 & Simpson, 1990; Milanovic et al., 2014). The consequences of time-lagged intraspecific competition on  
247 the spread of and damage by BTM remain however to be investigated in the field. Particular efforts should  
248 be dedicated to the identification of host traits controlling the performance of BTM larvae and the the  
249 interaction between these traits and the the higher trophic level.

## 250 6 Acknowledgements

251 We thank Alex Stemmelen, and Yannick Mellerin for their help in BTM rearing and data collection. This  
252 research was founded by the HOMED project, which received funding from the European Union's Horizon  
253 2020 research and innovation program under grant agreement No. 771271.

## 254 7 Data accessibility

255 Raw data as well as codes of statistic analysis are available in supplementary material and on the INRA  
256 dataverse: Castagneyrol, Bastien; van Halder, Inge; Kadiri, Yasmine; Schillé, Laura; Jactel, Hervé, 2020, "Raw  
257 data for the paper 'Host-mediated, cross-generational intraspecific competition in a multivoltine herbivore  
258 species', <https://doi.org/10.15454/KMUX39>, Portail Data INRAE, V1

## 259 8 References

260 Abdala-Roberts L, Reyes-Hernández M, Quijano-Medina T, Moreira X, Francisco M, Angulo DF, Parra-Tabla  
261 V, Virgen A & Rojas JC (2019) Effects of amount and recurrence of leaf herbivory on the induction of direct



- 262 and indirect defences in wild cotton. *Plant Biology* 21:1063–1071.
- 263 Agrawal A (1999) Induced responses to herbivory in wild radish: Effects on several herbivores and plant  
264 fitness. *Ecology* 80:1713–1723.
- 265 Alkan Akıncı H & Kurdoğlu O (2019) Damage Level of *Cydalima perspectalis* (Lepidoptera: Crambidae)  
266 on Naturally Growing and Ornamental Box Populations in Artvin, Turkey. *Kastamonu Üniversitesi Orman*  
267 *Fakültesi Dergisi*.
- 268 Averill AL & Prokopy RJ (1987) Intraspecific Competition in the Tephritid Fruit Fly *Rhagoletis Pomonella*.  
269 *Ecology* 68:878–886.
- 270 Barnes EE & Murphy SM (2018) Time-lagged intraspecific competition in temporally separated cohorts of a  
271 generalist insect. *Oecologia* 186:711–718.
- 272 Baur B, Jung J & Rusterholz H-P (2019) Defoliation of wild native box trees (*Buxus sempervirens*): Does box  
273 rust (*Puccinia buxi*) infection influence herbivory, survival and growth of the invasive *Cydalima perspectalis*?  
274 *Journal of Applied Entomology* 143:766–775.
- 275 Benrey B & Denno RF (1997) The slow-growth–high-mortality hypothesis: A test using the cabbage butterfly.  
276 *Ecology* 78:987–999.
- 277 Bergamini LL & Almeida-Neto M (2015) Female Preference and Offspring Performance in the Seed Beetle  
278 *Gibbobruchus bergamini* Manfio & Ribeiro-Costa (Coleoptera: Chrysomelidae): A Multi-Scale Comparison.  
279 *Neotropical Entomology* 44:328–337.
- 280 Blenn B, Bandoly M, Küffner A, Otte T, Geiselhardt S, Fatouros NE & Hilker M (2012) Insect Egg Deposition  
281 Induces Indirect Defense and Epicuticular Wax Changes in *Arabidopsis thaliana*. *Journal of Chemical Ecology*  
282 38:882–892.
- 283 Bultman TL & Faeth SH (1986) Experimental Evidence for Intraspecific Competition in a Lepidopteran Leaf  
284 Miner. *Ecology* 67:442–448.
- 285 Burnham KP & Anderson DR (2002) Model selection and multimodel inference a practical information-  
286 theoretic approach. Springer, New York.
- 287 Coley PD, Bateman ML & Kursar TA (2006) The effects of plant quality on caterpillar growth and defense  
288 against natural enemies. *Oikos* 115:219–228.
- 289 De Moraes CM, Mescher MC & Tumlinson JH (2001) Caterpillar-induced nocturnal plant volatiles repel  
290 conspecific females. *Nature* 410:577–580.
- 291 Denno RF, McClure MS & Ott JR (1995) Interspecific Interactions in Phytophagous Insects: Competition  
292 Reexamined and Resurrected. *Annual Review of Entomology* 40:297–331.
- 293 Faeth SH (1986) Indirect Interactions Between Temporally Separated Herbivores Mediated by the Host Plant.  
294 *Ecology* 67:479–494.
- 295 Faeth SH (1992) Interspecific and Intraspecific Interactions Via Plant Responses to Folivory: An Experimental  
296 Field Test. *Ecology* 73:1802–1813.
- 297 Fatouros NE, Lucas-Barbosa D, Weldegergis BT, Pashalidou FG, Loon JJA van, Dicke M, Harvey JA, Gols  
298 R & Huigens ME (2012) Plant Volatiles Induced by Herbivore Egg Deposition Affect Insects of Different  
299 Trophic Levels. *PLOS ONE* 7:e43607.
- 300 Fox J, Weisberg S, Adler D, Bates D, Baud-Bovy G, Ellison S, Firth D, Friendly M, Gorjanc G, Graves S,  
301 Heiberger R, Laboissiere R, Monette G, Murdoch D, Nilsson H, Ogle D, Ripley B, Venables W, Winsemius  
302 D, Zeileis A & R-Core (2016) *Car: Companion to Applied Regression*.
- 303 G ripenberg S, Mayhew PJ, Parnell M & Roslin T (2010) A meta-analysis of preference–performance  
304 relationships in phytophagous insects. *Ecology Letters* 13:383–393.
- 305 Hashem MY, Ahmed AAI, Mohamed SM, Sewify GH & Khalil SH (2013) Oviposition deterrent effect of

- 306 *Spodoptera littoralis* (Boisd.) larval frass to adult females of two major noctuid insect pests. *Archives of*  
307 *Phytopathology and Plant Protection* 46:911–916.
- 308 Hilker M & Fatouros NE (2015) Plant Responses to Insect Egg Deposition. *Annual Review of Entomology*  
309 60:493–515.
- 310 Hopper KR (1999) Risk-spreading and bet-hedging in insect population biology. *Annual Review of Entomology*  
311 44:535–560.
- 312 Jones TH & Finch S (1987) The effect of a chemical deterrent, released from the frass of caterpillars of the  
313 garden pebble moth, on cabbage root fly oviposition. *Entomologia Experimentalis et Applicata* 45:283–288.
- 314 Kaplan I & Denno RF (2007) Interspecific interactions in phytophagous insects revisited: A quantitative  
315 assessment of competition theory. *Ecology Letters* 10:977–994.
- 316 Karban R (2011) The ecology and evolution of induced resistance against herbivores. *Functional Ecology*  
317 25:339–347.
- 318 Kaygin AT & Taşdelci C (2019) *Cydalima perspectalis* (Walker) (Lepidoptera: Crambidae, Spilomelinae) in  
319 Türkiye’de Coğrafi Yayılışı, Yaşam Döngüsü Ve Zararı. *Bartın Orman Fakültesi Dergisi* 21:833–847.
- 320 Kenis M, Nacambo S, Leuthardt FLG, Domenico F di & Haye T (2013) The box tree moth, *Cydalima*  
321 *perspectalis*, in Europe: Horticultural pest or environmental disaster? *Aliens: The Invasive Species Bulletin*:38–  
322 41.
- 323 Leuthardt FLG & Baur B (2013) Oviposition preference and larval development of the invasive moth *Cydalima*  
324 *perspectalis* on five European box-tree varieties. *Journal of Applied Entomology* 137:437–444.
- 325 Leuthardt FLG, Glauser G & Baur B (2013) Composition of alkaloids in different box tree varieties and their  
326 uptake by the box tree moth *Cydalima perspectalis*. *Chemoecology* 23:203–212.
- 327 Marchand D & McNeil JN (2004) Avoidance of intraspecific competition via host modification in a grazing,  
328 fruit-eating insect. *Animal Behaviour* 67:397–402.
- 329 Martinez G, Finozzi MV, Cantero G, Soler R, Dicke M & Gonzalez A (2017) Oviposition preference but not  
330 adult feeding preference matches with offspring performance in the bronze bug *Thaumastocoris peregrinus*.  
331 *Entomologia Experimentalis Et Applicata* 163:101–111.
- 332 Matošević D, Matošević D, Croatian Forest Research Institute, Cvjetno naselje 41, HR-10450 Jastrebarsko,  
333 Croatia, Bras A, INRA, UR633 Unité de Recherche de Zoologie Forestière, 2163 Avenue de la Pomme de  
334 Pin, CS 40001 ARDON45075 ORLEANS Cedex 2, France, Lacković N, Croatian Forest Research Institute,  
335 Cvjetno naselje 41, HR-10450 Jastrebarsko, Croatia, Pernek M & Croatian Forest Research Institute, Cvjetno  
336 naselje 41, HR-10450 Jastrebarsko, Croatia (2017) Spatial Distribution, Genetic Diversity and Food Choice  
337 of Box Tree Moth (*Cydalima perspectalis*) in Croatia. *South-east European forestry* 8.
- 338 Milanovic S, Lazarevic J, Popovic Z, Miletic Z, Kostic M, Radulovic Z, Karadzic D & Vuleta A (2014)  
339 Preference and performance of the larvae of *Lymantria dispar* (Lepidoptera: Lymantriidae) on three species  
340 of European oaks. *European Journal of Entomology* 111:371–378.
- 341 Molnár BP, Tóth Z & Kárpáti Z (2017) Synthetic blend of larval frass volatiles repel oviposition in the  
342 invasive box tree moth, *Cydalima perspectalis*. *Journal of Pest Science* 90:873–885.
- 343 Moreira X, Abdala-Roberts L & Castagneyrol B (2018) Interactions between plant defence signalling pathways:  
344 Evidence from bioassays with insect herbivores and plant pathogens (M Rees, Ed. by). *Journal of Ecology*  
345 106:2353–2364.
- 346 Moura RR, Ribeiro PVA, Pereira BG, Quero A, Carvalho RL & Oliveira DC (2017) Food, shelter or  
347 competitors? Overlapping of life stages and host plant selection in a Neotropical stink bug species. *Journal*  
348 *of Plant Interactions* 12:560–566.
- 349 Nykänen H & Koricheva J (2004) Damage-induced changes in woody plants and their effects on insect

- 350 herbivore performance: A meta-analysis. *Oikos* 104:247–268.
- 351 Pinheiro J, Bates D, DebRoy S, Sarkar D & Team RC (2020) *Nlme: Linear and Nonlinear Mixed Effects*  
352 *Models*.
- 353 Poelman EH, Broekgaarden C, Loon JJaV & Dicke M (2008) Early season herbivore differentially affects  
354 plant defence responses to subsequently colonizing herbivores and their abundance in the field. *Molecular*  
355 *Ecology* 17:3352–3365.
- 356 Root RB & Kareiva PM (1984) The Search for Resources by Cabbage Butterflies (*Pieris Rapae*): Ecological  
357 Consequences and Adaptive Significance of Markovian Movements in a Patchy Environment. *Ecology*  
358 65:147–165.
- 359 Sato Y, Yano S, Takabayashi J & Ohsaki N (1999) *Pieris rapae* (*Lepidoptera* : *Pieridae*) females avoid  
360 oviposition on *Rorippa indica* plants infested by conspecific larvae. *Applied Entomology and Zoology*  
361 34:333–337.
- 362 Shiojiri K & Takabayashi J (2003) Effects of specialist parasitoids on oviposition preference of phytophagous  
363 insects: Encounter–dilution effects in a tritrophic interaction. *Ecological Entomology* 28:573–578.
- 364 Simpson SJ & Simpson C (1990) The Mechanisms of Nutritional Compensation by Phytophagous Insects.  
365 *Insect-Plant Interactions (1990) : Volume II*. CRC Press,
- 366 Stam JM, Kroes A, Li Y, Gols R, Loon JJ van, Poelman EH & Dicke M (2014) Plant Interactions with  
367 Multiple Insect Herbivores: From Community to Genes. *Annual Review of Plant Biology* 65:689–713.
- 368 Team RC (2018) *R: A language and environment for statistical computing*.
- 369 Uesugi A (2015) The slow-growth high-mortality hypothesis: Direct experimental support in a leafmining fly.  
370 *Ecological Entomology* 40:221–228.
- 371 Visakorpi K, Riutta T, Martínez-Bauer AE, Salminen J-P & Gripenberg S (2019) Insect community structure  
372 covaries with host plant chemistry but is not affected by prior herbivory. *Ecology* 100:e02739.
- 373 Wan H, Haye T, Kenis M, Nacambo S, Xu H, Zhang F & Li H (2014) Biology and natural enemies of  
374 *Cydalima perspectalis* in Asia: Is there biological control potential in Europe? *Journal of Applied Entomology*  
375 138:715–722.
- 376 Weeraddana CDS & Evenden ML (2019) Herbivore-induced plants do not affect oviposition but do affect  
377 fitness of subsequent herbivores on canola. *Entomologia Experimentalis et Applicata* 167:341–349.
- 378 Wise MJ & Weinberg AM (2002) Prior flea beetle herbivory affects oviposition preference and larval  
379 performance of a potato beetle on their shared host plant. *Ecological Entomology* 27:115–122.
- 380 Wratten SD, Edwards PJ & Winder L (1988) Insect herbivory in relation to dynamic changes in host plant  
381 quality. *Biological Journal of the Linnean Society* 35:339–350.
- 382 Zuur AF (2009) *Mixed effects models and extensions in ecology with R*. Springer, New York; London.

## 383 9 Appendix

### 384 9.1 Supplementary figure

385 **Figure S1** - Semivariogram of the number of egg clutches as a function of distance among box trees.

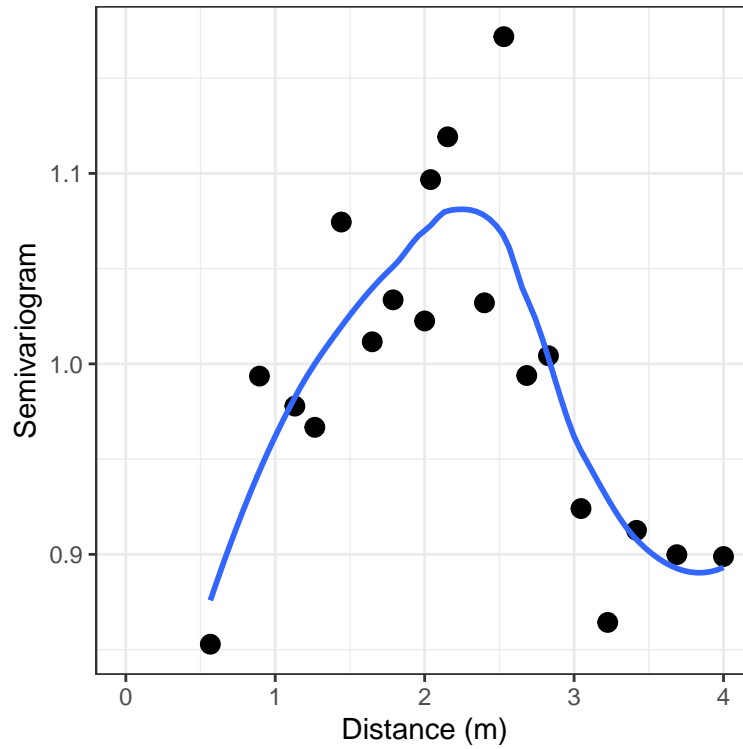

386

## 387 9.2 Supplementary table containing raw data

388 **Table S1** - Raw data used in the present manuscript: *x* and *y* are the position of each box tree in the  
389 green house; **Treatment** is the prior herbivory treatment; **Clutch.number** is the total number of egg clutches  
390 counted on a given box tree; **N.L3** is the number of retrieved L3 larvae, **L3.mean** is the mean weight of a  
391 L3 larvae (g); **N.chrysalids** is the number of retrieved chrysalids; **Chrysalid.mean** is the mean weight of a  
392 chrysalid.

| x  | y | Treatment    | Clutch.number | N.L3 | L3.mean   | N.chrysalids | Chrysalid.mean |
|----|---|--------------|---------------|------|-----------|--------------|----------------|
| 1  | 1 | Attacked     | 22            | 5    | 0.0221740 | 0            | NaN            |
| 2  | 1 | Attacked     | 8             | 5    | 0.0183980 | 0            | NaN            |
| 3  | 1 | Attacked     | 12            | 5    | 0.0187360 | 1            | 0.1020100      |
| 4  | 1 | Non attacked | 7             | 5    | 0.0142200 | 6            | 0.1612240      |
| 5  | 1 | Attacked     | 6             | 5    | 0.0146140 | 0            | NaN            |
| 6  | 1 | Attacked     | 10            | 5    | 0.0165620 | 2            | 0.1101750      |
| 7  | 1 | Non attacked | 19            | 5    | 0.0140740 | 6            | 0.1295600      |
| 8  | 1 | Attacked     | 20            | 5    | 0.0110140 | 1            | 0.0961900      |
| 9  | 1 | Attacked     | 4             | 5    | 0.0132300 | 1            | 0.1438500      |
| 10 | 1 | Attacked     | 25            | 5    | 0.0057520 | 1            | 0.0891900      |
| 11 | 1 | Non attacked | 14            | 5    | 0.0252560 | 4            | 0.0800775      |
| 1  | 2 | Attacked     | 12            | 5    | 0.0226500 | 2            | 0.2062350      |
| 2  | 2 | Attacked     | 10            | 5    | 0.0162200 | 1            | 0.0524100      |
| 3  | 2 | Attacked     | 9             | 5    | 0.0200760 | 0            | NaN            |
| 4  | 2 | Attacked     | 11            | 5    | 0.0211200 | 5            | 0.1465000      |
| 5  | 2 | Non attacked | 9             | 5    | 0.0160880 | 2            | 0.1455000      |
| 6  | 2 | Non attacked | 11            | 4    | 0.0332225 | 11           | 0.1486660      |
| 7  | 2 | Attacked     | 5             | 5    | 0.0112560 | 0            | NaN            |
| 8  | 2 | Non attacked | 4             | 5    | 0.0192900 | 10           | 0.1718880      |
| 9  | 2 | Attacked     | 4             | 5    | 0.0161760 | 1            | 0.1338800      |
| 10 | 2 | Attacked     | 4             | 5    | 0.0173680 | 1            | 0.1706800      |
| 11 | 2 | Non attacked | 18            | 5    | 0.0164180 | 1            | 0.1142100      |
| 1  | 3 | Attacked     | 14            | 5    | 0.0159000 | 4            | 0.1686525      |
| 2  | 3 | Non attacked | 3             | 5    | 0.0193180 | 8            | 0.1842200      |
| 3  | 3 | Non attacked | 5             | 5    | 0.0277660 | 10           | 0.1413480      |
| 4  | 3 | Attacked     | 5             | 5    | 0.0159420 | 2            | 0.1380100      |
| 5  | 3 | Attacked     | 6             | 5    | 0.0121100 | 1            | 0.1319100      |
| 6  | 3 | Non attacked | 8             | 5    | 0.0535020 | 9            | 0.1464700      |
| 7  | 3 | Non attacked | 1             | 5    | 0.0197740 | 11           | 0.1815320      |
| 8  | 3 | Non attacked | 2             | 5    | 0.0334440 | 9            | 0.2104500      |
| 9  | 3 | Non attacked | 2             | 5    | 0.0144920 | 2            | 0.1980650      |
| 10 | 3 | Non attacked | 8             | 5    | 0.0188620 | 7            | 0.1529100      |
| 11 | 3 | Attacked     | 11            | 5    | 0.0101960 | 1            | 0.0836300      |
| 1  | 4 | Attacked     | 2             | 5    | 0.0111600 | 2            | 0.1224050      |
| 2  | 4 | Non attacked | 21            | 5    | 0.0127880 | 2            | 0.1022250      |
| 3  | 4 | Attacked     | 11            | 5    | 0.0157420 | 0            | NaN            |
| 4  | 4 | Attacked     | 11            | 5    | 0.0158140 | 4            | 0.1557575      |
| 5  | 4 | Non attacked | 2             | 5    | 0.0171240 | 1            | 0.1575800      |
| 6  | 4 | Attacked     | 2             | 5    | 0.0238660 | 2            | 0.1728600      |
| 7  | 4 | Non attacked | 11            | 5    | 0.0151460 | 0            | NaN            |
| 8  | 4 | Attacked     | 5             | 5    | 0.0187260 | 2            | 0.1527050      |
| 9  | 4 | Non attacked | 5             | 5    | 0.0256880 | 5            | 0.1158560      |
| 10 | 4 | Non attacked | 5             | 5    | 0.0171440 | 3            | 0.1927033      |
| 11 | 4 | Attacked     | 8             | 5    | 0.0181900 | 0            | NaN            |
| 1  | 5 | Non attacked | 4             | 5    | 0.0185720 | 3            | 0.1905400      |
| 2  | 5 | Non attacked | 3             | 5    | 0.0363840 | 20           | 0.1862420      |
| 3  | 5 | Non attacked | 4             | 5    | 0.0224060 | 8            | 0.1504320      |
| 4  | 5 | Non attacked | 4             | 5    | 0.0291180 | 9            | 0.1339320      |
| 5  | 5 | Attacked     | 1             | 5    | 0.0201820 | 1            | 0.1914500      |
| 6  | 5 | Non attacked | 2             | 5    | 0.0313100 | 2            | 0.1725900      |
| 7  | 5 | Attacked     | 1             | 5    | 0.0148320 | 3            | 0.1752800      |
| 8  | 5 | Attacked     | 2             | 5    | 0.0176160 | 1            | 0.0853400      |
| 9  | 5 | Non attacked | 15            | 5    | 0.0130960 | 1            | 0.1001600      |
| 10 | 5 | Attacked     | 10            | 5    | 0.0171925 | 1            | 0.1453700      |
| 11 | 5 | Non attacked | 7             | 5    | 0.0128840 | 2            | 0.1279200      |
| 1  | 6 | Attacked     | 4             | 5    | 0.0158160 | 2            | 0.1774000      |
| 2  | 6 | Non attacked | 4             | 5    | 0.0225620 | 11           | 0.1544600      |
| 3  | 6 | Non attacked | 4             | 5    | 0.0242120 | 4            | 0.1544200      |

### 393 9.3 All code for this report

```
library(tidyverse)
library(knitr)
library(kableExtra)
library(nlme)
library(car)
library(citr)
library(here)

wd = here()

my.ggplot <- function(){
  theme_bw() + theme(legend.key = element_blank())
}

knitr::opts_chunk$set(echo= F, warning= F, message = F, results = "hide",
  fig.width=4, fig.height=4, dpi= 100, fig.pos = "H",
  fig.path = paste0(wd, '/Figures/'))

d = read.csv(paste0(wd, '/Data/BTM_data.csv'), header = T)

str(d)

d =
  d %>% mutate(L3.mean = Weight.L3 / N.L3) %>%
  mutate(Treatment = factor(Treatment, levels = c("Non attacked", "Attacked")))
knitr::include_graphics(paste0(wd, '/Figures/Figure 1.png'))

d %>%
  ggplot(aes(x, y, shape = Treatment, fill = log1p(Clutch.number))) +
  # geom_rect(aes(xmin = 1.5, ymin = 1.5, xmax = 10.5, ymax = 10.5), fill = 'grey90') +
  geom_point(size = 6) +
  scale_shape_manual(values = c(21, 24)) +
  my.ggplot() +
  labs(x = "", y = "") +
  scale_fill_gradientn(colours = c('white', 'grey', 'black'), values = c(0,0.6,1), name = 'No. egg clutches')
d %>%
  select(Treatment, Clutch.number, N.L3, N.chysalids) %>%
  gather(Resp, Val, 2:4) %>%
  group_by(Treatment, Resp) %>%
  summarise(N = sum(Val), M = round(mean(Val),2), SD = round(sd(Val),2)) %>%
  mutate(Val = paste(M, ' (', SD, ')', ', n = ', N, sep = '')) %>%
  select(- N, - M, - SD) %>%
  mutate(Resp = factor(Resp, levels = c('Clutch.number', 'N.L3', 'N.chysalids'), labels = c('Egg clutches', 'Larvae', 'Chrysalis')))
  kable(col.names = c('Response variable', 'Control', 'Herbivory treatment'),
    caption = "Repartition of egg clutches, larvae and chrysalis across box trees with or without predators")
d.center = droplevels(d[d$x > 1 & d$x < 11 & d$y > 1 & d$y < 11,])
m0 = gls(log1p(Clutch.number) ~ Treatment, data = d, na.action = "na.omit")
m1a = gls(log1p(Clutch.number) ~ Treatment, correlation = corExp(form = ~x + y, nugget = TRUE), data = d)
m1b = gls(log1p(Clutch.number) ~ Treatment, correlation = corGaus(form = ~x + y, nugget = TRUE), data = d)
m1c = gls(log1p(Clutch.number) ~ Treatment, correlation = corSpher(form = ~x + y, nugget = TRUE), data = d)
```

```
m1d = gls(log1p(Clutch.number) ~ Treatment, correlation = corLin(form = ~x + y, nugget = TRUE), data = d)
m1e = gls(log1p(Clutch.number) ~ Treatment, correlation = corRatio(form = ~x + y, nugget = TRUE), data = d)

Table_AIC = AIC(m0, m1a, m1b, m1c, m1d, m1e)
Table_AIC$AIC = round(Table_AIC$AIC, 1)
Table_AIC$Delta = Table_AIC$AIC - min(Table_AIC$AIC)
# Table_AIC %>% kable() %>% kableExtra::kable_styling()

# plot_resid = function(model) {
#   df = data.frame(Residuals = residuals(model),
#                   Fitted = fitted(model))
#   #
#   A = df %>% ggplot(aes(Fitted, Residuals)) +
#     my.ggplot() +
#     geom_point() +
#     geom_smooth(method = "lm", se = F) +
#     geom_hline(yintercept = 0)
#   #
#   B = df %>% ggplot(aes(Residuals)) + my.ggplot() + geom_histogram()
#   #
#   cowplot::plot_grid(A, B)
# }
#
# plot_resid(m1e)
# Alternative approach fitting *x* and *y* position in the greenhouse together with `treatment` and `N.a`
#
# m = MASS::glm.nb(Clutch.number ~ Treatment * N.attacked, data = d.center)
# Anova(m)
# #
# # var.resid = Variogram(residuals(m), dist(d.center %>% select(x, y)))
# # var.resid %>%
# #   ggplot(aes(dist, variog)) +
# #     my.ggplot() +
# #     geom_point(size = 3) +
# #     geom_smooth(se = F) +
# #     labs(x = "Distance (m)", y = "Semivariogram")
plot.resid = function(m){
  df = data.frame(f = fitted(m), r = residuals(m))
  A = df %>%
    ggplot(aes(f, r)) + my.ggplot() + geom_point() + geom_smooth(method = "lm", se = F) + geom_hline(yintercept = 0)
  B = df %>%
    ggplot(aes(r)) + my.ggplot() + geom_histogram()
  cowplot::plot_grid(A,B)
}

m_larvae = lm(log(L3.mean) ~ Clutch.number * Treatment , d)

# plot.resid(m_larvae)

d =
  d %>%
  mutate(Chrysalid.mean = Weight.chrysalids / N.weighted.chysalids)
```

```
m_chrys = lm(log(Chrysalid.mean) ~ Clutch.number * Treatment , d)
# plot.resid(m2)
Table_AIC %>%
  mutate(Model = paste('Model', 1:6),
           'Correlation structure' = c('None', 'Exponential', 'Gaussian', 'Spherical', 'Linear', 'Rational'),
           select(Model, `Correlation structure`, everything()) %>%
           kable(caption = "Summary of AIC of GLS models testing the effect of prior herbivory on the number of egg clutches")
Anova(m1e)

Fig_3A =
  d %>%
  ggplot(aes(Treatment, Clutch.number)) +
  my.ggplot() +
  geom_point(position = position_jitter(0.1), colour = "grey80") +
  stat_summary(size = 0.6) +
  labs(x = "Prior herbivory", y = "Number of egg clutches") +
  annotate(geom = 'text', x = 1:2, y = 26, label = paste("n =", c(61, 60)))
res_larvae = Anova(m_larvae)
n = expand.grid(Treatment = levels(d$Treatment), Clutch.number = seq(0, 25))
p = predict(update(m_larvae, ~.- Clutch.number:Treatment), newdata = n)
n$Fit = 1000 * exp(p)

Fig_3B =
  d %>%
  ggplot(aes(Clutch.number, 1000 * L3.mean, colour = Treatment)) +
  my.ggplot() +
  geom_point(size = 2) +
  scale_colour_manual(values = c("grey25", "grey70")) +
  labs(x = "Number of egg clutches",
       y = expression("Mean larval weight" %+-% "SE (mg)")) +
  geom_line(data = n, aes(Clutch.number, Fit), size = 1.5) +
  theme(legend.position = c(0.8, 0.85))
r = with(d, cor.test(Chrysalid.mean, L3.mean))

cowplot::plot_grid(
  Fig_3A + labs(title = 'Eggs'),
  Fig_3B + labs(title = 'Larvae'),
  ncol = 2,
  labels = c('A', 'B')
)
X = c("Number of egg clutches", "Herbivory", "Eggs x Herbivory")
Fval = function(x) {round(x[,3], 2)}
Pval = function(x) {ifelse(x[,4] < 0.001, '< 0.001', round(x[,4], 3))}
df = rep("1, 117", 3)
b = round(summary(m_larvae)$coefficients[-1,1], 2)
b_se = round(summary(m_larvae)$coefficients[-1,2], 2)
Estimate = paste(b, ' (', b_se, ')', sep = '')

data.frame(#Response = c('Larvae', '', ''),
           Predictor = X,
           df = df,
           Estimate = Estimate,
           `F-value` = Fval(res_larvae)[-4],
```



```
      `P-value` = Pval(res_larvae)[-4]) %>%
  kable(caption = "Summary of models testing the effect of prior herbivory and initial egg clutch density",
        col.names = c("Predictor", "df", "Estimate (SE)", "F-value", "P-value"), escape = T, digit = 2) %>%
m0 = gls(log1p(Clutch.number) ~ x + y, data = d, na.action = "na.omit")
variog0 <- Variogram(m0, form = ~x + y, resType = "pearson", nugget = T)
variog0 %>%
  ggplot(aes(0.4*dist, variog0)) +
  my.ggplot() +
  geom_point(size = 3) +
  geom_smooth(se = F) +
  labs(x = "Distance (m)", y = "Semivariogram") +
  xlim(0, 4)
d %>%
  rename(N.chrysalids = N.chysalids) %>%
  select(x, y, Treatment, Clutch.number, N.L3, L3.mean, N.chrysalids, Chrysalid.mean) %>% kable() %>% k
```
